# Supplementary figures and images for: Characteristics of and Treatment Strategies for Advanced EGFR-Mutant NSCLC With Concomitant BRAF Variations
Source: PubMed Central journal article supplement — JTO Clin Res Rep. 2022 Jun 9;3(7):100348. doi: 10.1016/j.jtocrr.2022.100348 (PMC9250018; doi:10.1016/j.jtocrr.2022.100348), 2022-06-09

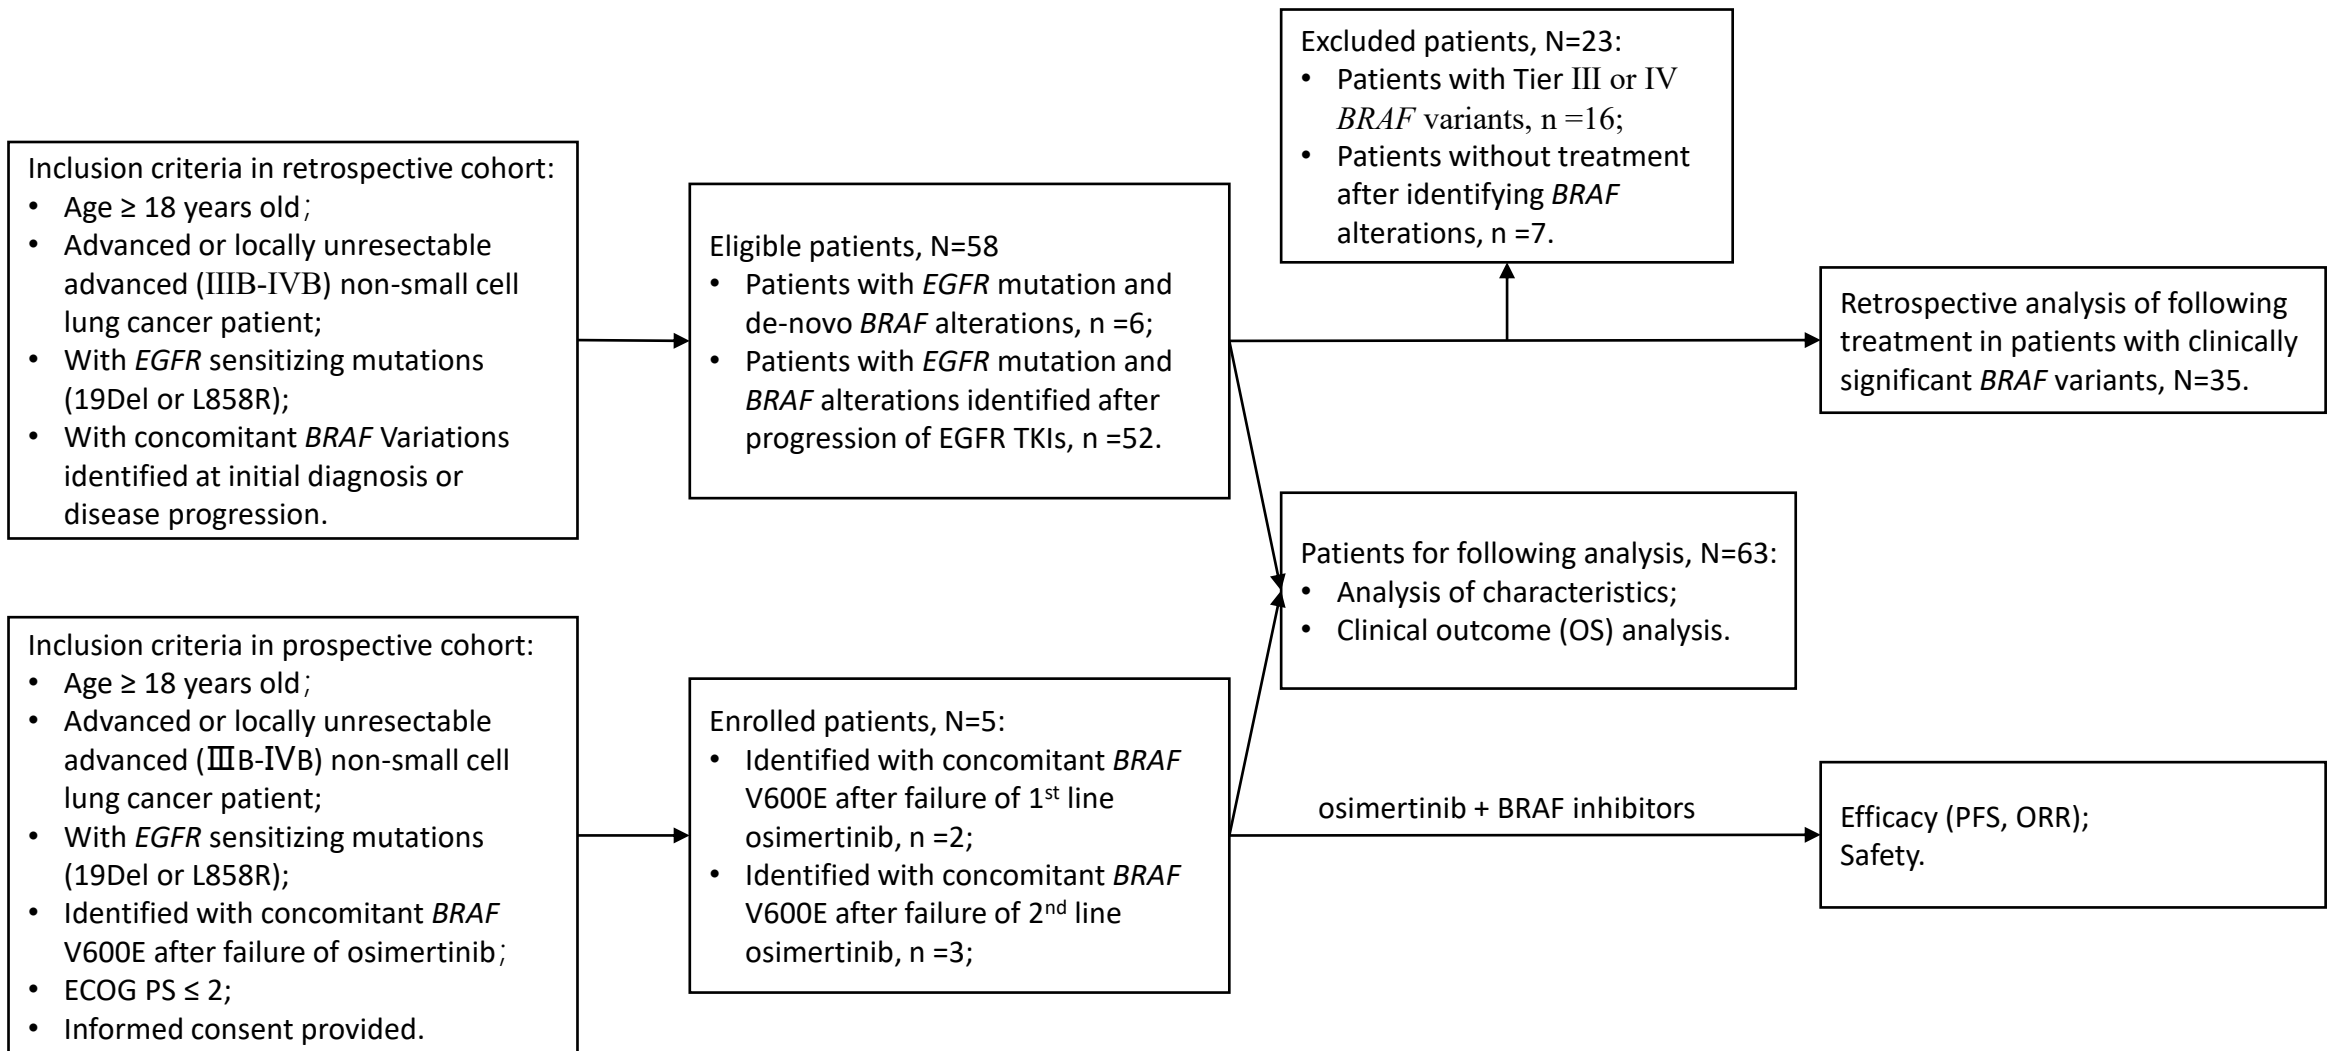

Supplement: mmc1.pdf [file mmc1.pdf]

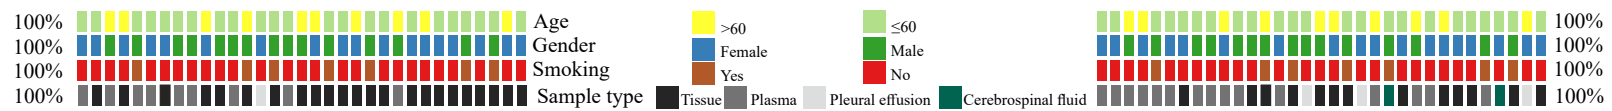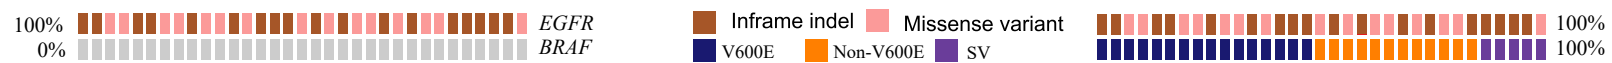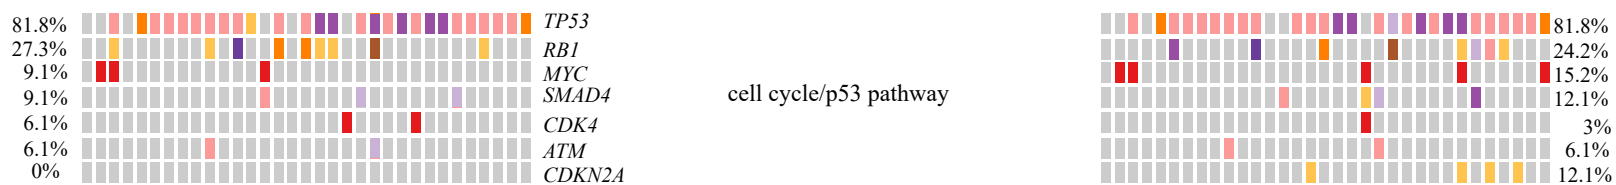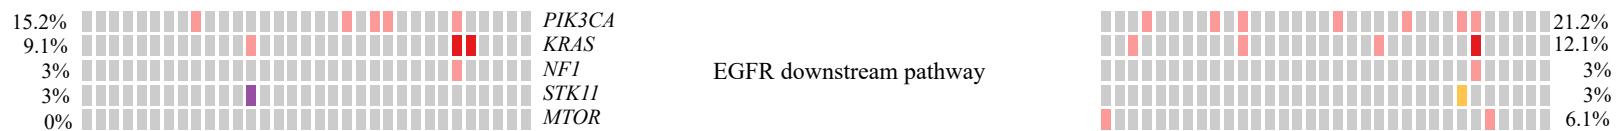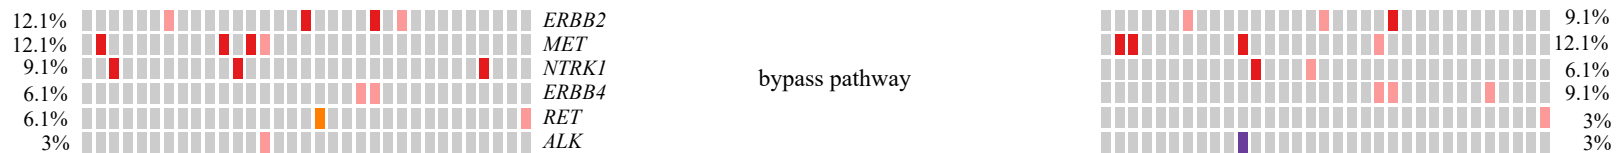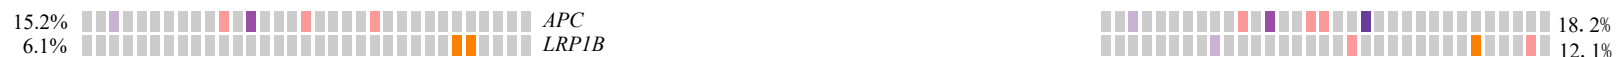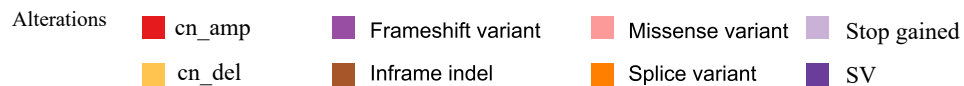

Supplement: mmc2.pdf [file mmc2.pdf]
